# Supplementary figures and images for: Proteomic Analysis Identifies Distinct Protein Patterns for High Ovulation in FecB Mutant Small Tail Han Sheep Granulosa Cells
Source: MDPI journal article supplement (doi:10.3390/ani14010011), 2023-12-19

A

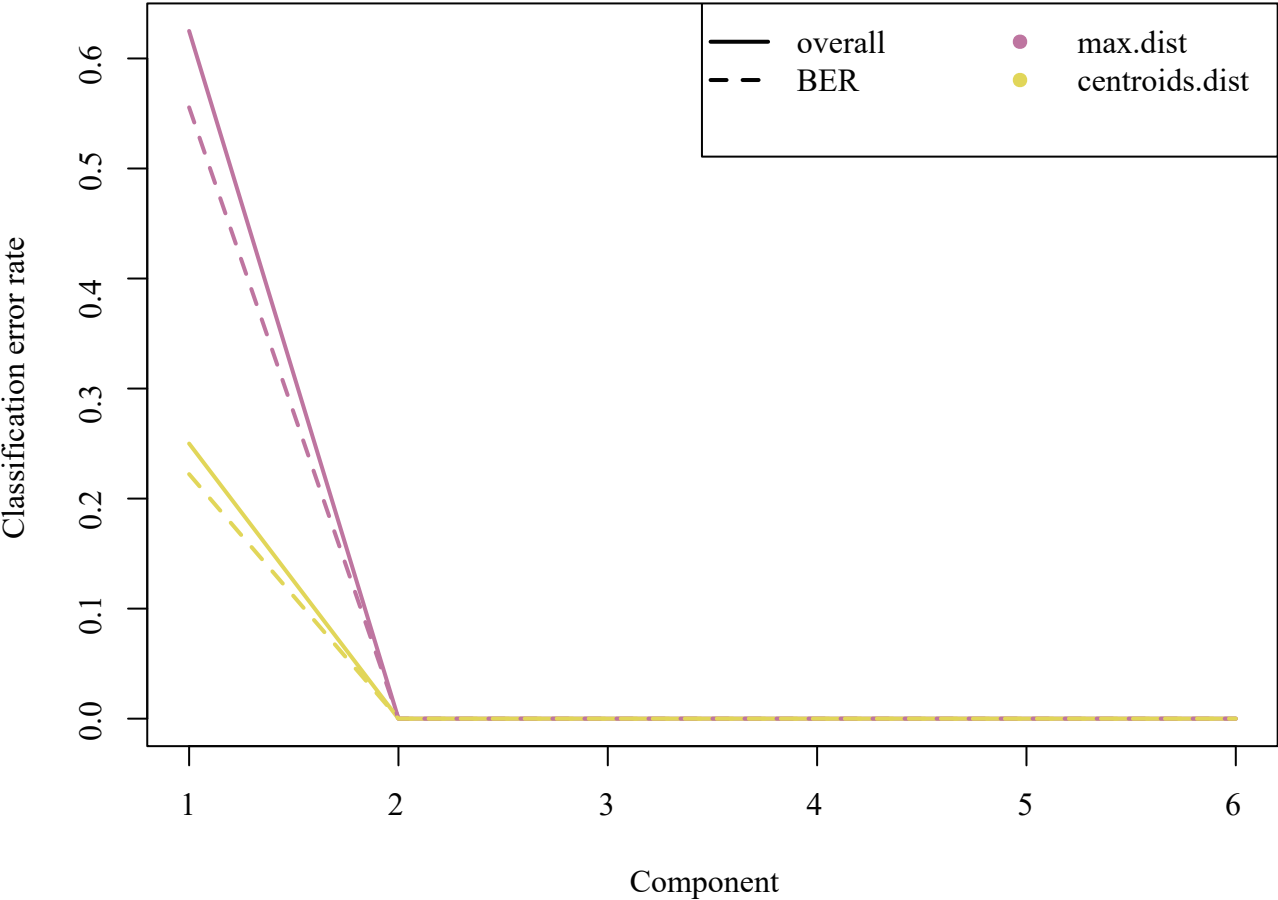

B

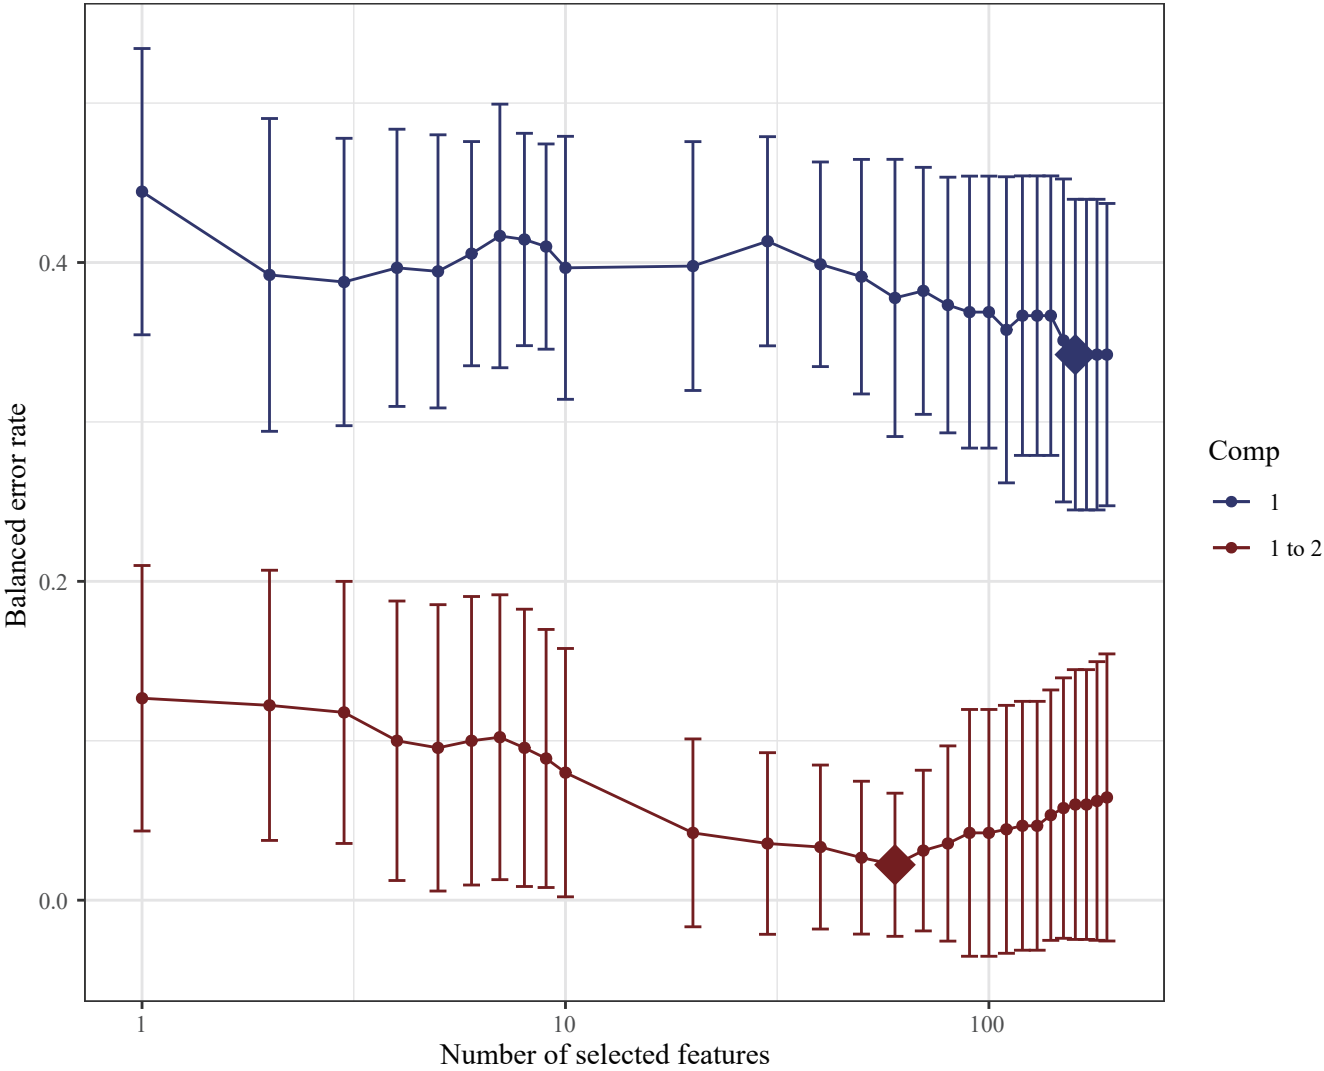

Supplement: s1 [file s1]

A

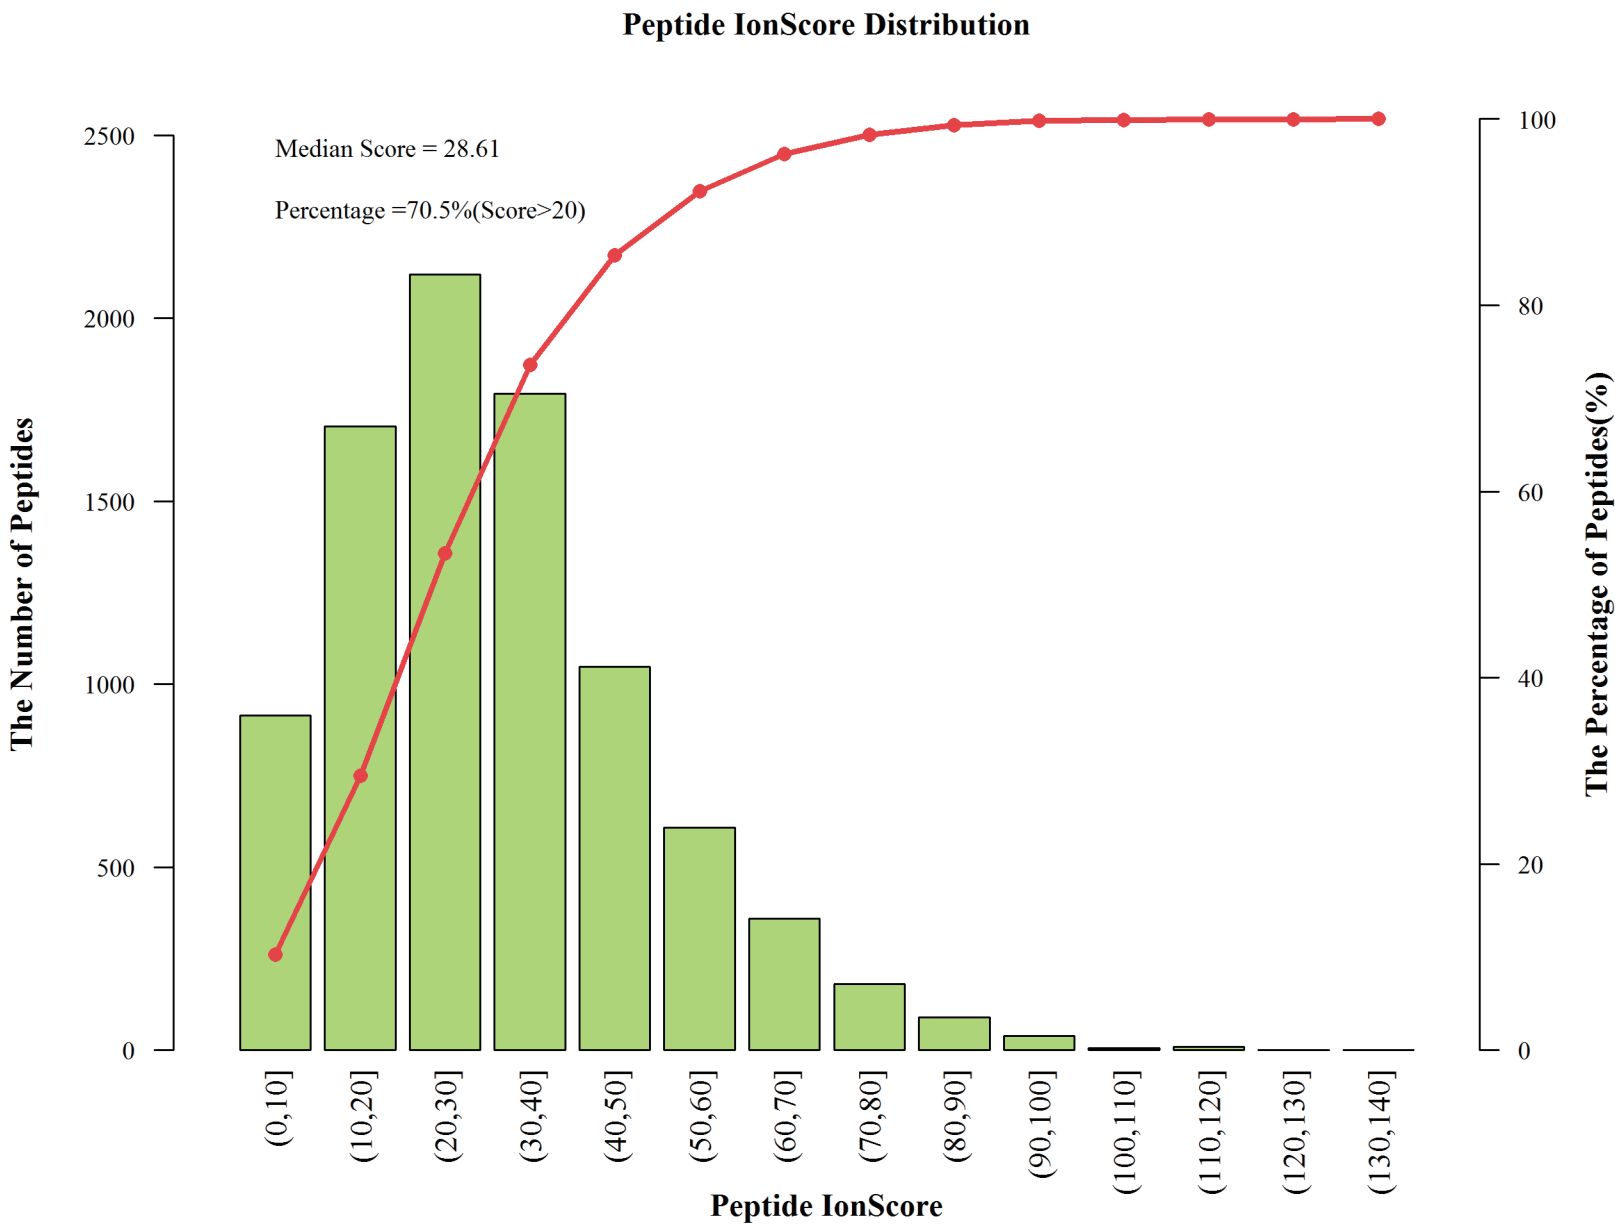

B

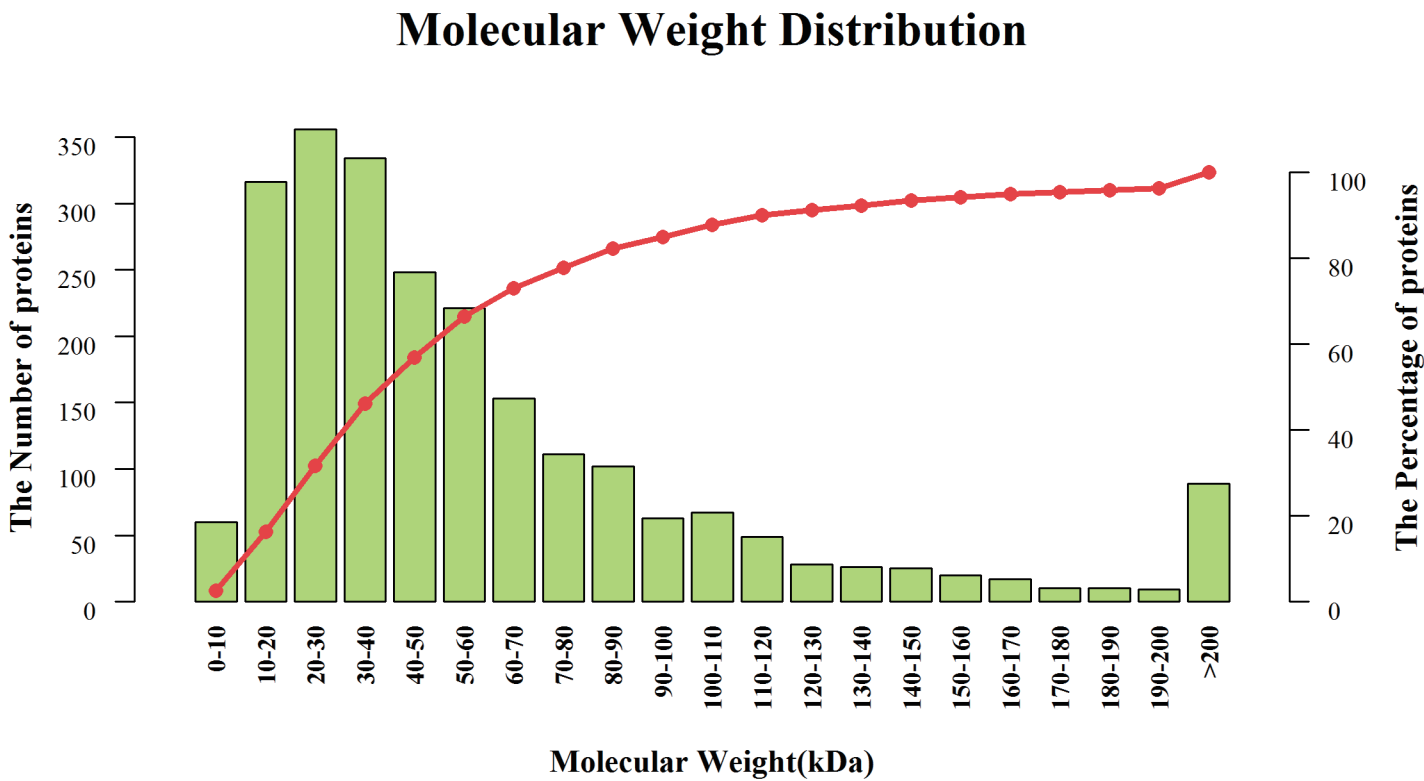

C

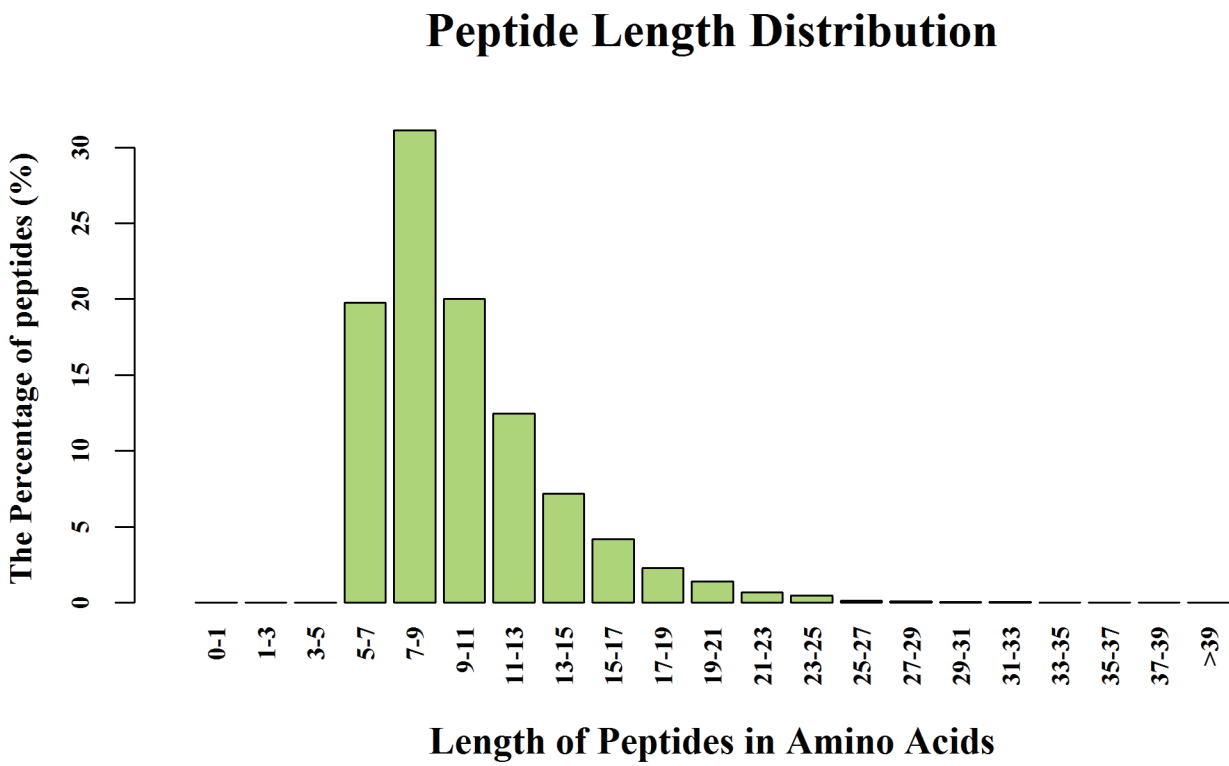

Supplement: s1 [file s1]
